# Supplementary material for: Endothelial Dysfunction and Passive Changes in the Aorta and Coronary Arteries of Diabetic db/db Mice
Source: PubMed Central journal article supplement (PMC7324802; doi:10.3389/fphys.2020.00667), 2020-06-23
Supplement: Data_Sheet_1.pdf [file Data_Sheet_1.pdf]

## **Supplementary data file**

Endothelial dysfunction and passive changes in the aorta and coronary arteries of diabetic db/db mice

Lilliana Beck<sup>1</sup>, Junjing Su<sup>1</sup>, Simon Comerma-Steffensen<sup>1</sup>, Estéfano Pinilla<sup>1</sup>, Rune Carlsson<sup>1</sup>, Raquel Hernanz<sup>1, 2</sup>, Majid Sheykhzade<sup>3</sup>, Carl Christian Danielsen<sup>1</sup> and Ulf Simonsen<sup>1, #</sup>

<sup>1</sup>Department of Biomedicine, Pulmonary and Cardiovascular Pharmacology, Faculty of Health, Aarhus University, Denmark

<sup>2</sup>Departamento de Ciencias Básicas de la Salud, Universidad Rey Juan Carlos, Alcorcón, Spain

<sup>3</sup>Department of Drug Design and Pharmacology, Faculty of Health and Medical Sciences, University of Copenhagen, Denmark

## **1 Methods and materials**

### **1.1. Animals and preparation of samples**

Male and female 8-week old db/db mice (C57BLKS/J-lepr<sup>db</sup>/lepr<sup>db</sup>) and age- and sex-matched db/db+ littermate controls (C57BLKS/J-lepr<sup>db/db+</sup>) were purchased from Taconic Europe (Ry, Denmark). All animal care and experimental protocols in this study were conducted under the supervision of a veterinarian and in accordance with the Danish legislation of animal use for scientific procedures as described in the 'Animal Testing Act' (Consolidation Act No. 726 of 9 September 1993 as amended by Act No. 1081 of 20 December 1995) and approved by the Danish Animal Experiments Inspectorate (permission 2014-15-2934-01059).

### **1.2. Transthoracic echocardiography**

Echocardiography (Vevo2100, Visual Sonics, Toronto, Canada) was performed using a linear array probe (MS 550D, 22 – 55MHz) on the spontaneously breathing mouse that was placed in the left lateral decubitus position on a heating pad adjusted to 37 °C. The animal's electrocardiography (ECG) signal was captured through copper electrodes on the heating pad.

### **1.3. Passive mechanical studies in aorta segments**

Mechanical testing was performed on aorta segments. The ring specimens were pushed at minimal strain onto a tapered glass rod until the rod filled the lumen. These were then photographed twice using a Nikon microscope equipped with a circular polarization filter. Average wall thickness was estimated from traced (ImageJ 1.50e) cross-sectional areas at four random locations. An image of a millimeter scale was used for calibration (Supplementary Figure S1).

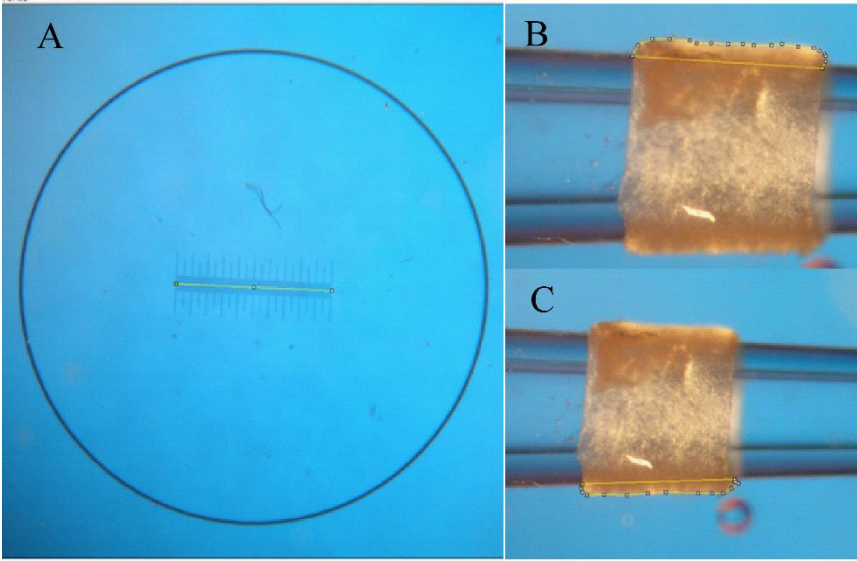

**Supplementary Figure S1. Representative image of aorta ring segment.** The vessel wall area (outlined in yellow) was measured by calibrating it to a millimeter scale and the vessel wall thickness was derived by assuming a height of 1 mm for all segments.

**Supplementary Table S1.** Calculation of passive properties of coronary arteries mounted in a small vessel pressure myograph.

|               |                                                                                             |                                                        |
|---------------|---------------------------------------------------------------------------------------------|--------------------------------------------------------|
| 1- WT         | Wall Thickness                                                                              | $WT = \frac{(D_e - D_i)}{2}$                           |
| 2- W:L        | Wall:Lumen ratio                                                                            | $W:L = \frac{(D_e - D_i)}{2 \cdot D_i}$                |
| 3- ID         | Incremental Distensibility                                                                  | $ID = \frac{\Delta D_i}{D_i \cdot \Delta P} \cdot 100$ |
| 4- $\sigma$   | Stiffness: Circumferential wall stress<br>Stress-strain relationship                        | $\sigma = \frac{(P \cdot D_i)}{2 \cdot WT}$            |
| 5- $\epsilon$ | Circumferential wall strain                                                                 | $\epsilon = \frac{(D_i - D_{i@10mmHg})}{D_{i@10mmHg}}$ |
| 6- $\sigma$   | Stiffness<br>incremental elastic modulus, $E_{inc} = \frac{\delta \sigma}{\delta \epsilon}$ | $\sigma = \sigma_{10mmHg} e^{\beta \epsilon}$          |

De, external diameter; Di, internal diameter;  $\Delta P$ , increase in pressure.

## 2 Results

### 2.1. Functional studies in the aorta and coronary arteries from male db/db mice

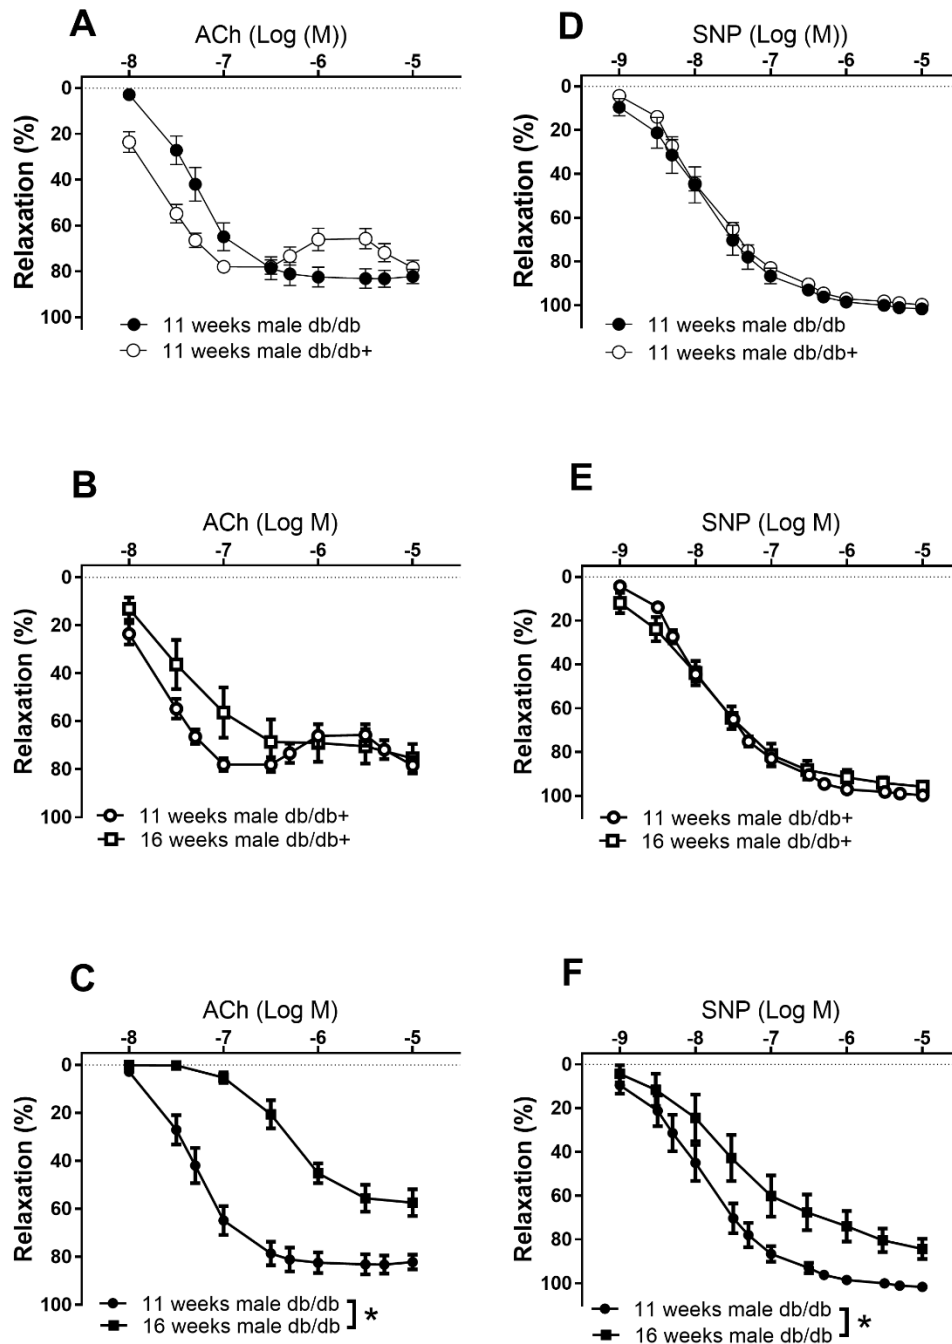

**Supplementary Figure S2. Acetylcholine and sodium nitroprusside relaxations in the aorta from 11- and 16-week old control (db/db+) and diabetic male mice.** Average aorta relaxations in segments contracted with phenylephrine. (A) Small rightshift in acetylcholine (ACh) relaxation in aorta from diabetic db/db male mice (n=12) compared to normoglycaemic db/db+ male mice (n=12). (B) ACh relaxation in aorta from 11- and 16-week db/db+ male mice. (C) The impairment of acetylcholine relaxation was more pronounced in aorta segments from 16-week male db/db mice

compared to 11-week old male diabetic db/db mice. (D) Unaltered SNP relaxation in aorta from 11-week old diabetic db/db male mice (n=12) compared to normoglycaemic db/db+ (n=12) male mice. (E) Unaltered relaxations induced by the NO donor sodium nitroprusside (SNP) in aorta from 11- and 16-week db/db+ male mice. (F) Impaired SNP relaxations in aorta from 16-week male db/db mice compared to 11-week old male diabetic db/db mice. The results are means±SEM. \*P<0.05, 16-week old db/db versus 11-week old db/db mice.

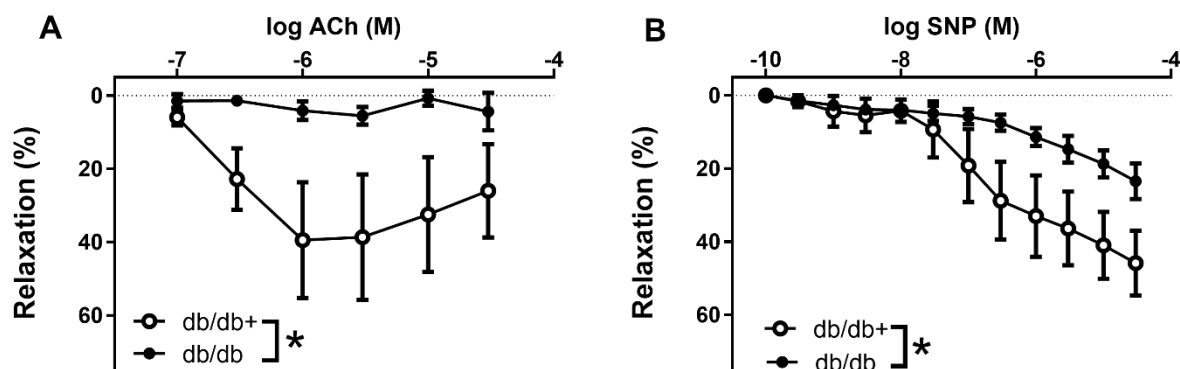

**Supplementary Figure S3. Impaired acetylcholine and sodium nitroprusside relaxations in coronary arteries contracted by the thromboxane analog, U46619.**

Average coronary artery relaxations induced by (A) acetylcholine (ACh) in left anterior descending (LAD) coronary arteries from male db/db+ (n=5) and diabetic db/db mice (n=5). (B) Relaxations induced by sodium nitroprusside (SNP), an NO-releasing drug in LAD from db/db+ control (n=6) and male diabetic db/db animals (n=6). The results are means±SEM. \*P<0.05 db/db versus db/db+ control mice.

**2.2. ECG measurements**

The duration of the PR-interval, QT-interval and the corrected QT-interval on the ECG were significantly prolonged in diabetic animals (supplementary Figure S4).

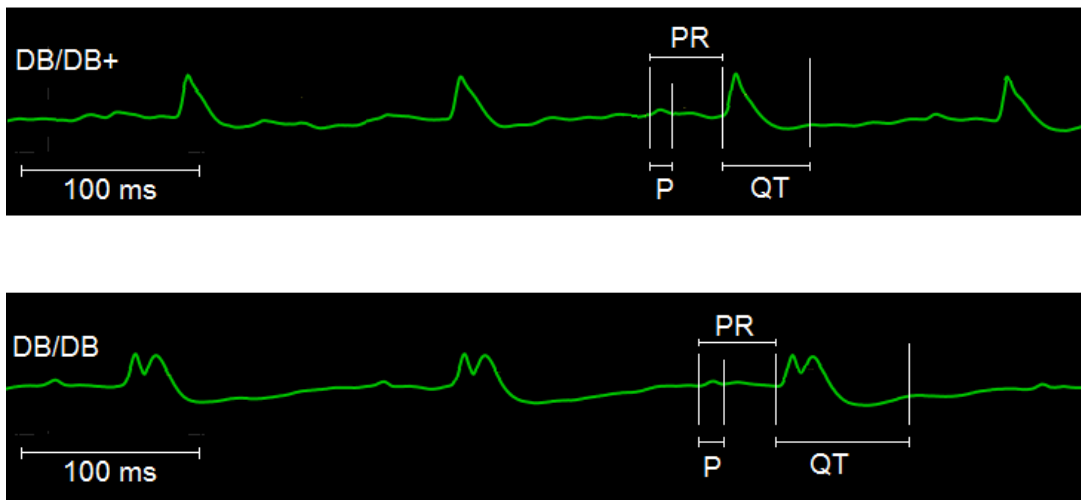

**Supplementary Figure S4.** Representative electrocardiogram from a diabetic db/db mouse and a control db/db+ mouse. Note the M-shaped QRS complex.

### 2.3. Transthoracic echocardiography

Echocardiography of aorta showed decreased mean flow and maximal flow velocity in diabetic db/db mice (Supplementary Figure S5).

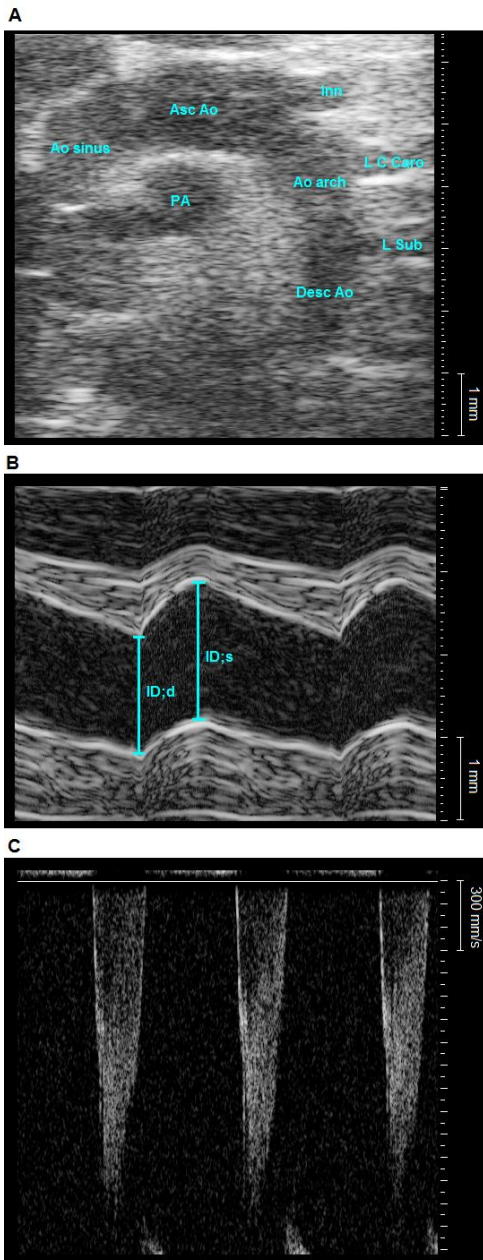

**Supplementary Figure S5. Representative echocardiographic images of aorta in a db/db mouse.** Representative images of the aortic arch (A, B-mode), the ascending aorta (B, M-mode) and flow through the aortic arch (C, pulse wave Doppler mode). Ao: aorta, Asc: ascending, d: diastole, Desc: descending, ID: inner diameter, Inn: innominate artery, L. C. Caro: left common carotid artery, L Sub: left subclavian artery, PA: right pulmonary artery.
